# Supplementary material for: The tiny Hairless protein from Apis mellifera: a potent antagonist of Notch signaling in Drosophila melanogaster
Source: PubMed Central journal article supplement (PMC2440387; doi:10.1186/1471-2148-8-175), 2008-06-17
Supplement: 1471-2148-8-175-S2.pdf [file 1471-2148-8-175-S2.pdf]

# A) *D. melanogaster* and *A. mellifera* Notch orthologues

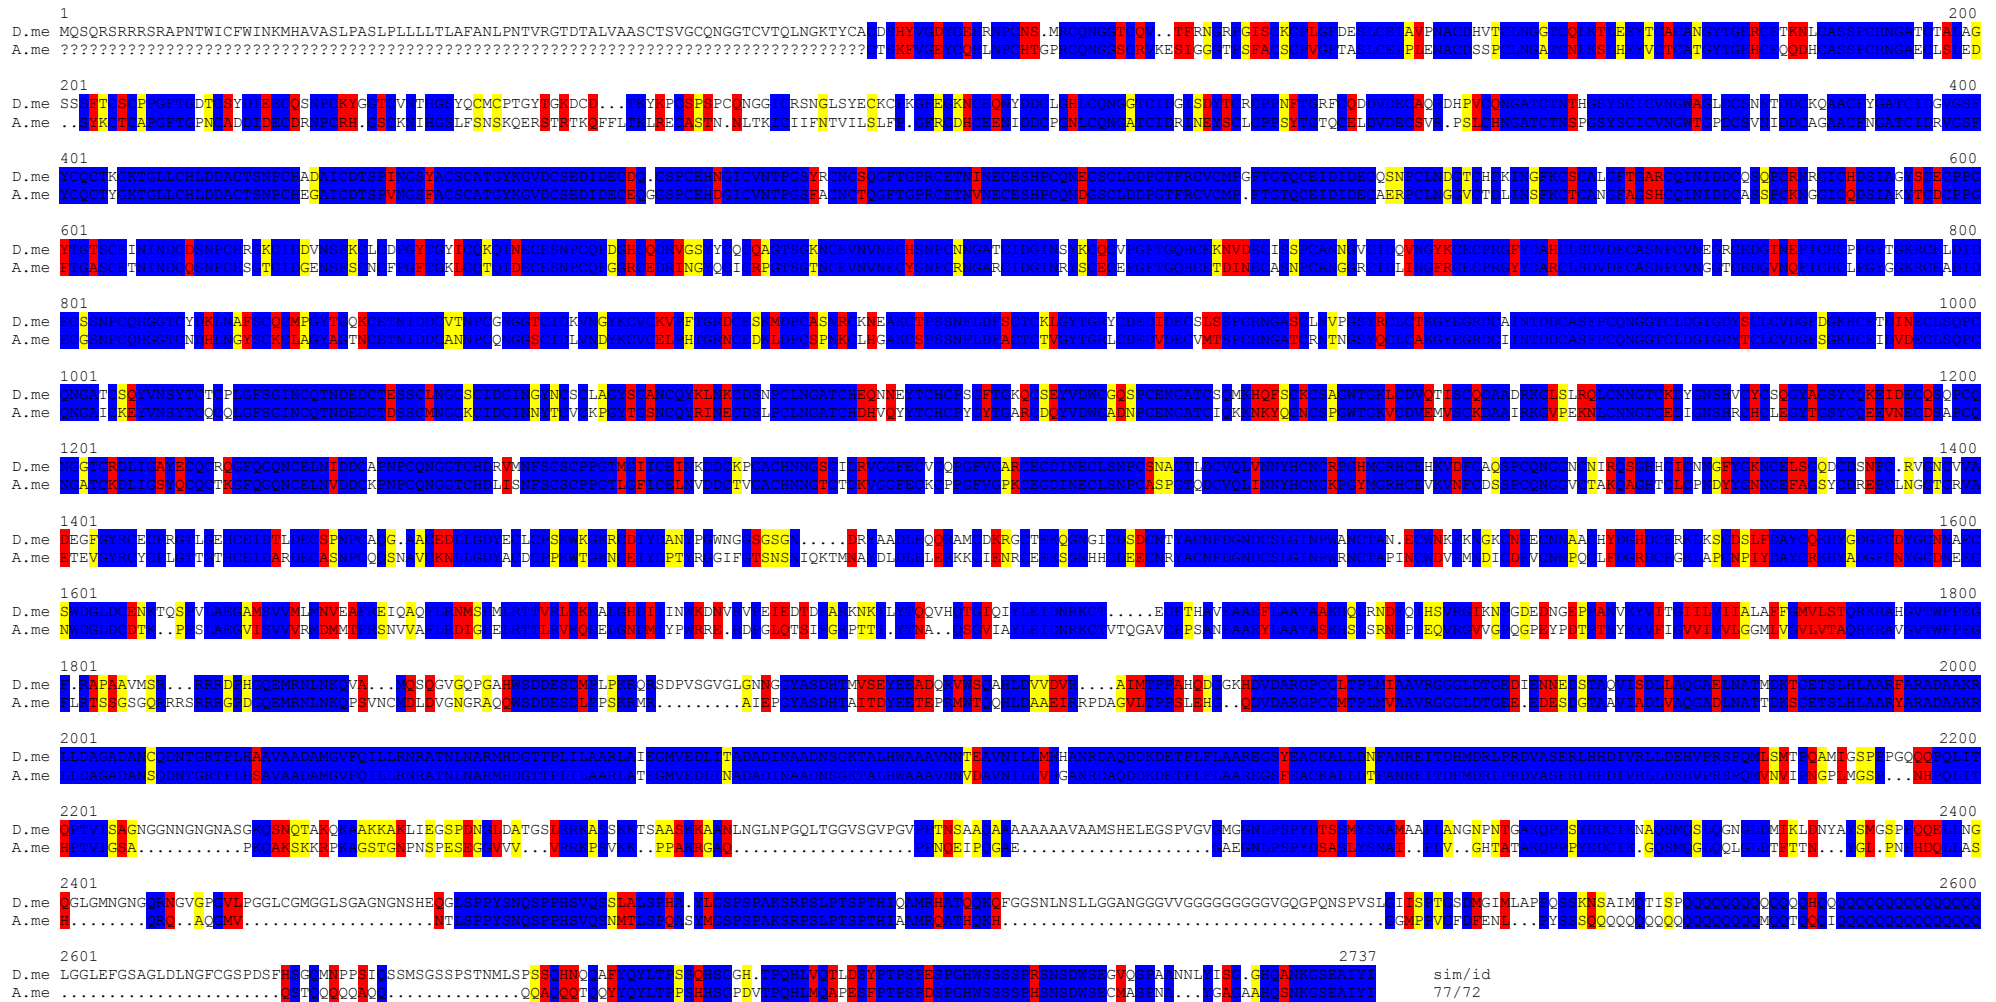





### **Figure S3**

#### **Conservation of Notch pathway components in honeybee.**

Single orthologues of Notch, Su(H), Gro, CtBP, Mam and Vg were identified in the honeybee genome. A.m. Protein sequences were deduced from genomic sequence and aligned with the respective *D. melanogaster* protein sequences. Blue, identical amino acids; red, highly similar amino acids; yellow, similar amino acids; dots represent gaps. Sequences similarities and identities are given in percent with respect to *D. melanogaster*. Gap in A.m.N is depicted by question marks.

Similarity and identity scores were calculated using BESTFIT (gap weight 1, length weight 1, maximum penalty length 30). Multi-alignments were done with PRRN with gap extension penalty 1 and the gap open penalty 9, apart for the Vestigial comparison, where gap open penalty 4 was applied.
